# Supplementary material for: Another rapid event in the carbon-14 content of tree rings
Source: Springer Nature journal article supplement (doi:10.1038/ncomms2783), 2013-04-23
Supplement: 41467_2013_BFncomms2783_MOESM674_ESM.pdf [file 41467_2013_BFncomms2783_MOESM674_ESM.pdf]

## Supplementary information

### Supplementary figures

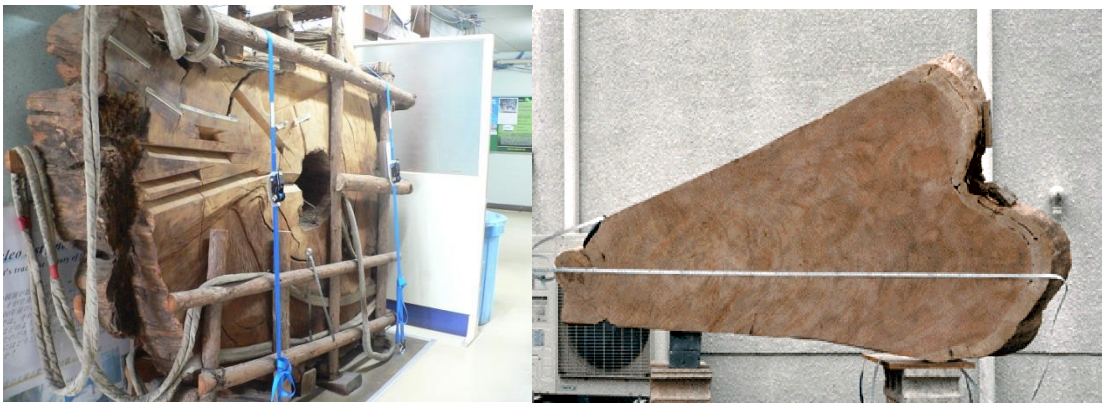

Supplementary Figure S1 Photos of Tree-A (left) and Tree-C (right).

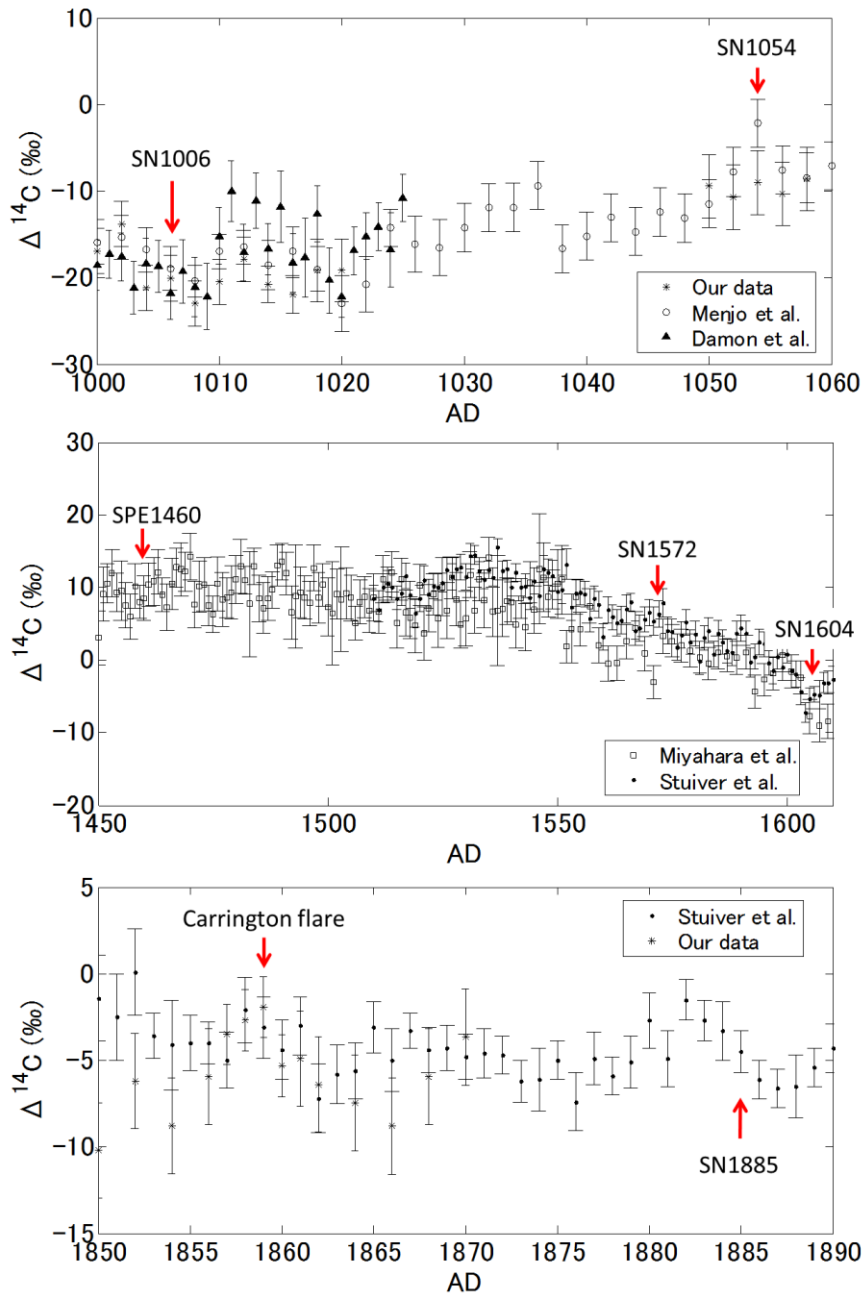

**Supplementary Figure S2 Annual or biennial  $^{14}\text{C}$  records around recorded years of supernovae and large SPEs.** (upper)  $\Delta^{14}\text{C}$  records from AD 1000 to 1060. The open circles are data of Menjo et al. (2005)<sup>11</sup>, and the filled triangles are data of Damon et al. (1995)<sup>12</sup>. The two arrows indicate SN1006 and SN1054. (middle) From AD 1450 to 1610. The open squares are data of Miyahara et al. (2006, 2007)<sup>16,29</sup>, and the dots are data of Stuiver et al. (1998)<sup>13</sup>. The three arrows indicate SPE1460, SN1572, and SN1604. (bottom) From AD 1850 to 1890. The two arrows indicate the Carrington flare (SPE1859) and SN1885.

## Supplementary tables

**Supplementary Table S1. Information of two Japanese cedar trees.**

|                             | Tree-A                 | Tree-C                                 |
|-----------------------------|------------------------|----------------------------------------|
| Measured period             | AD 600-1020, 1050-1058 | AD 1850-1870                           |
| Growing age                 | AD 97-1956             | AD 1280-1991                           |
| Utilize age                 | AD 97-1551             | AD 1280-1991                           |
| Method of age determination | dendro-chronology      | Bomb effect peak and dendro-chronology |
| Location                    | 30.3°N, 130.5°E        | 30.2°N, 130.3°E                        |

**Supplementary Table S2. Resultant values of  $\Delta^{14}\text{C}$ .**

| AD 775 event |                           |           | AD 994 event |                           |           |
|--------------|---------------------------|-----------|--------------|---------------------------|-----------|
| AD           | $\Delta^{14}\text{C}$ [‰] | Error [‰] | AD           | $\Delta^{14}\text{C}$ [‰] | Error [‰] |
| 770          | -18.5                     | 1.2       | 989          | -20.2                     | 1.9       |
| 771          | -20.9                     | 1.9       | 990          | -25.3                     | 2.9       |
| 772          | -17.7                     | 1.2       | 991          | -21.5                     | 1.5       |
| 773          | -22.4                     | 1.9       | 992          | -22.8                     | 2.0       |
| 774          | -17.7                     | 1.5       | 993          | -20.7                     | 1.6       |
| 775          | -5.8                      | 1.8       | 994          | -11.5                     | 2.0       |
| 776          | -2.5                      | 1.5       | 995          | -12.9                     | 1.5       |
| 777          | -5.3                      | 1.8       | 996          | -11.3                     | 2.0       |
| 778          | -4.7                      | 1.5       | 997          | -14.2                     | 2.0       |
| 779          | -7.2                      | 1.8       | 998          | -15.3                     | 2.0       |
| 780          | -6.0                      | 1.8       | 999          | -13.3                     | 1.6       |
| 782          | -7.2                      | 2.0       | 1001         | -15.0                     | 2.9       |
| 784          | -9.5                      | 2.0       | 1003         | -17.0                     | 2.6       |
| 786          | -10.0                     | 2.0       | 1005         | -13.8                     | 2.6       |
| 788          | -12.0                     | 2.0       | 1007         | -21.1                     | 2.6       |
| 790          | -13.3                     | 1.9       | 1009         | -20.1                     | 2.6       |
| 792          | -13.8                     | 2.0       | 1011         | -23.0                     | 2.6       |
| 794          | -12.1                     | 2.0       | 1013         | -20.5                     | 2.6       |
| 796          | -11.5                     | 2.0       | 1015         | -17.9                     | 2.6       |
| 798          | -14.7                     | 2.2       | 1017         | -20.8                     | 2.1       |

|     |       |     |      |       |     |
|-----|-------|-----|------|-------|-----|
| 800 | -13.3 | 2.0 | 1019 | -22.0 | 2.1 |
|     |       |     | 1021 | -19.2 | 3.6 |

### Supplementary References

29. Miyahara, H. *et al.*, Variation of solar activity from the Spörer to the Maunder minima indicated by radiocarbon content in tree-rings. *Adv. Space Res.* **40**, 1060-1063 (2007).
